# Supplementary material for: The Association Between Changes in the University Educational Setting and Peer Relationships: Effects in Students' Depressive Symptoms During the COVID-19 Pandemic
Source: Frontiers journal article supplement (doi:10.3389/fpsyt.2021.783776), 2021-12-14
Supplement: Data_Sheet_1.PDF [file Data_Sheet_1.PDF]

## Supplementary file

Table 1: Participant distribution per University Faculty

| <b>Faculty</b>                      | <b>n</b> | <b>%</b> |
|-------------------------------------|----------|----------|
| Engineering                         | 82       | 23.41%   |
| Humanities                          | 69       | 18.85%   |
| Sciences                            | 8        | 2.19%    |
| Biomedical Sciences                 | 29       | 7.92%    |
| Economics                           | 28       | 7.65%    |
| Law                                 | 35       | 9.56%    |
| Psychology and Educational Sciences | 24       | 5.56%    |
| Arts                                | 23       | 6.28%    |
| Pharmaceutical Sciences             | 20       | 5.46%    |
| Medicine                            | 19       | 5.19%    |
| Nutrition                           | 14       | 3.83%    |
| Architecture                        | 4        | 1.09%    |
| Sports                              | 8        | 2.19%    |
| Dental Medicine                     | 3        | 0.82%    |

Table 2: PHQ-9 scores frequency.

| <b>Score</b> | <b>Oct 2019<br/>N (%)</b> | <b>June 2020<br/>N (%)</b> | <b>March 2021<br/>N (%)</b> |
|--------------|---------------------------|----------------------------|-----------------------------|
| 0            | 25 (6.83%)                | 3 (0.82%)                  | 3 (0.82%)                   |
| 1            | 22 (6.01%)                | 18 (4.92%)                 | 4 (1.09%)                   |
| 2            | 21 (5.74%)                | 6 (1.64%)                  | 8 (2.19%)                   |
| 3            | 21 (5.74%)                | 23 (6.28%)                 | 14 (3.83%)                  |
| 4            | 20 (5.46%)                | 15 (4.10%)                 | 19 (5.19%)                  |
| 5            | 22 (6.01%)                | 14 (3.83%)                 | 10 (2.73%)                  |
| 6            | 12 (3.28%)                | 20 (5.46%)                 | 9 (2.46%)                   |
| 7            | 13 (3.55%)                | 10 (2.73%)                 | 17 (4.64%)                  |
| 8            | 21 (5.74%)                | 12 (3.28%)                 | 7 (1.91%)                   |
| 9            | 36 (9.84%)                | 19 (5.19%)                 | 24 (6.56%)                  |
| 10           | 18 (4.92%)                | 13 (3.55%)                 | 10 (2.73%)                  |
| 11           | 15 (4.10%)                | 13 (3.55%)                 | 15 (4.10%)                  |
| 12           | 10 (2.73%)                | 19 (5.19%)                 | 14 (3.83%)                  |
| 13           | 15 (4.10%)                | 28 (7.65%)                 | 15 (4.10%)                  |
| 14           | 13 (3.55%)                | 12 (3.28%)                 | 18 (4.92%)                  |
| 15           | 10 (2.73%)                | 14 (3.83%)                 | 16 (4.37%)                  |
| 16           | 9 (2.46%)                 | 15 (4.10%)                 | 27 (7.38%)                  |
| 17           | 8 (2.19%)                 | 16 (4.37%)                 | 18 (4.92%)                  |
| 18           | 5 (1.37%)                 | 10 (2.73%)                 | 19 (5.19%)                  |
| 19           | 9 (2.46%)                 | 16 (4.37%)                 | 11 (3.01%)                  |
| 20           | 5 (1.37%)                 | 13 (3.55%)                 | 12 (3.28%)                  |
| 21           | 9 (2.46%)                 | 10 (2.73%)                 | 13 (3.55%)                  |
| 22           | 6 (1.64%)                 | 5 (1.37%)                  | 16 (4.37%)                  |
| 23           | 7 (1.91%)                 | 7 (1.91%)                  | 9 (2.46%)                   |
| 24           | 4 (1.09%)                 | 8 (2.19%)                  | 8 (2.19%)                   |
| 25           | 3 (0.82%)                 | 8 (2.19%)                  | 11 (3.01%)                  |
| 26           | 2 (0.55%)                 | 9 (2.46%)                  | 9 (2.46%)                   |
| 27           | 5 (1.37%)                 | 10 (2.73%)                 | 10 (2.73%)                  |

Table 3: GAD-7 scores frequency.

| <b>Score</b> | <b>Oct 2019<br/>N (%)</b> | <b>June 2020<br/>N (%)</b> | <b>March 2021<br/>N (%)</b> |
|--------------|---------------------------|----------------------------|-----------------------------|
| 0            | 19 (5.19%)                | 6 (1.64%)                  | 7 (1.91%)                   |
| 1            | 15 (4.10%)                | 15 (4.10%)                 | 13 (3.55%)                  |
| 2            | 21 (5.74%)                | 11 (3.01%)                 | 17 (4.64%)                  |
| 3            | 21 (5.74%)                | 10 (2.73%)                 | 15 (4.10%)                  |
| 4            | 20 (5.46%)                | 22 (6.01%)                 | 16 (4.37%)                  |
| 5            | 22 (6.01%)                | 17 (4.64%)                 | 18 (4.92%)                  |
| 6            | 12 (3.28%)                | 13 (3.55%)                 | 15 (4.10%)                  |
| 7            | 13 (3.55%)                | 14 (3.83%)                 | 18 (4.92%)                  |
| 8            | 14 (3.83%)                | 5 (1.37%)                  | 18 (4.92%)                  |
| 9            | 35 (9.56%)                | 9 (2.46%)                  | 15 (4.10%)                  |
| 10           | 15 (4.10%)                | 17 (4.64%)                 | 18 (4.92%)                  |
| 11           | 15 (4.10%)                | 22 (6.01%)                 | 15 (4.10%)                  |
| 12           | 33 (9.02%)                | 27 (7.38%)                 | 12 (3.28%)                  |
| 13           | 15 (4.10%)                | 15 (4.10%)                 | 14 (3.83%)                  |
| 14           | 13 (3.55%)                | 18 (4.92%)                 | 10 (2.73%)                  |
| 15           | 10 (2.73%)                | 16 (4.37%)                 | 11 (3.01%)                  |
| 16           | 15 (4.10%)                | 17 (4.64%)                 | 13 (3.55%)                  |
| 17           | 12 (3.28%)                | 13 (3.55%)                 | 18 (4.92%)                  |
| 18           | 17 (4.64%)                | 10 (2.73%)                 | 25 (6.83%)                  |
| 19           | 9 (2.46%)                 | 20 (5.46%)                 | 15 (4.10%)                  |
| 20           | 5 (1.37%)                 | 20 (5.46%)                 | 28 (7.65%)                  |
| 21           | 15 (4.10%)                | 49 (13.39%)                | 35 (9.56%)                  |
